# Supplementary material
Source: PubMed Central journal article supplement (PMC5279919)
Supplement: NIHMS844727-supplement-Supplemental.pdf [file NIHMS844727-supplement-Supplemental.pdf]

**SUPPLEMENTAL DATA FOR “TEMPORAL STABILITY IN CHRONIC WOUND  
MICROBIOTA IS ASSOCIATED WITH POOR HEALING”**

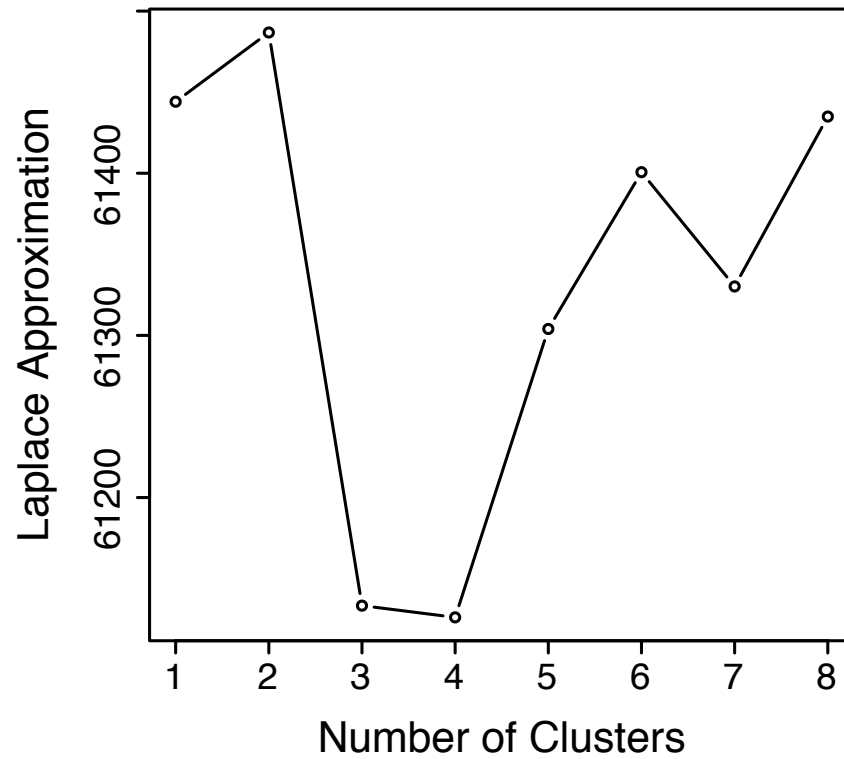

**Figure S1. Laplace approximation predicts 4 clusters as optimal.** The Laplace approximation of model evidence is a measure of the model fit. Lower values indicate better fits.

**Table S1. Patient and ulcer characteristics for the total sample and by complication status.**

‡ continuous level characteristics were analyzed with an independent samples t-test; Dichotomous characteristics were analyzed with Fisher's Exact Test; Other categorical characteristics were analyzed with Pearson's Chi-Square. An asterisk (\*) indicates  $p < 0.05$ .

| Characteristic                                   | Total Sample<br>(N=100) | Did not develop infection-<br>related complication<br>(n=69) | Developed infection-<br>related complication<br>(n=31) | ‡p-value      |
|--------------------------------------------------|-------------------------|--------------------------------------------------------------|--------------------------------------------------------|---------------|
| Age (years), mean (SD)                           | 54.1 (11.29)            | 55.4 (12.53)                                                 | 52.3 (7.65)                                            | 0.136         |
| Male sex, n (%)                                  | 78 (78.0)               | 56 (81.2)                                                    | 22 (71.0)                                              | 0.3           |
| White race, n (%)                                | 91 (91.0)               | 62 (89.9)                                                    | 20 (93.5)                                              | 0.498         |
| Type 2 diabetes, n (%)                           | 87 (87.0)               | 60 (87.0)                                                    | 27 (87.1)                                              | 1             |
| Duration of diabetes (years), mean (SD)          | 15.2 (11.31)            | 16.2 (11.55)                                                 | 12.7 (10.55)                                           | 0.147         |
| Baseline HbA1C (%), mean (SD)                    | 8.2 (1.87)              | 8.32 (1.96)                                                  | 8.0 (1.67)                                             | 0.461         |
| Baseline WBC (mm <sup>3</sup> ), mean (SD)       | 7950.5 (1905.97)        | 7751.5 (1916.58)                                             | 8387.1 (1837.52)                                       | 0.121         |
| C Reactive Protein (mg/L), mean (SD)             | 2.2 (4.78)              | 1.7 (3.04)                                                   | 3.2 (7.25)                                             | 0.284         |
| Ulcer duration (weeks), mean (SD)                | 31.1 (40.22)            | 33.5 (42.46)                                                 | 25.90 (34.81)                                          | 0.352         |
| Toe/brachial pressure index, mean (SD)           | 0.9 (0.25)              | 0.9 (0.27)                                                   | 0.9 (0.22)                                             | 0.803         |
| Ulcer surface area (cm <sup>2</sup> ), mean (SD) | 2.4 (3.32)              | 2.0 (3.01)                                                   | 3.3 (3.84)                                             | 0.101         |
| Ulcer depth (cm), mean (SD)                      | 0.3 (0.33)              | 0.2 (0.27)                                                   | 0.4 (0.39)                                             | <b>0.002*</b> |
| Ulcer location, n (%)                            |                         |                                                              |                                                        |               |
| Forefoot                                         | 73 (73.0)               | 50 (72.5)                                                    | 23 (74.2)                                              |               |
| Midfoot                                          | 20 (20.0)               | 13 (18.8)                                                    | 7 (22.6)                                               | 0.585         |
| Heel                                             | 7 (7.0)                 | 6 (8.7)                                                      | 1 (3.2)                                                |               |
| Transcutaneous oxygen level (mmHg), mean (SD)    | 46.9 (15.11)            | 49.1 (13.80)                                                 | 42.2 (17.00)                                           | 0.057         |

**Table S2. Summary of microbial communities in DFU samples.** For each bacterial taxon, the number of samples in which it was present was tabulated, and the mean relative abundance was calculated. These values were calculated for all samples, baseline only, and non-baseline samples. Taxa were filtered to those whose mean abundance was greater than 0.01.

| <b>Bacterial Taxon</b> | <b>Combined (n = 348)</b> |                   | <b>Baseline (n = 89)</b> |                   | <b>Rest (n = 259)</b> |                   |
|------------------------|---------------------------|-------------------|--------------------------|-------------------|-----------------------|-------------------|
|                        | <b>Samples</b>            | <b>Proportion</b> | <b>Samples</b>           | <b>Proportion</b> | <b>Samples</b>        | <b>Proportion</b> |
| Staphylococcus         | 345                       | 0.2277            | 86                       | 0.2188049         | 259                   | 0.2317            |
| aureus                 | 308                       | 0.1331            | 79                       | 0.1559            | 229                   | 0.1257            |
| pettenkoferi           | 287                       | 0.0532            | 60                       | 0.0290            | 227                   | 0.0617            |
| unclassified           | 301                       | 0.0402            | 69                       | 0.0308            | 232                   | 0.0435            |
| Streptococcus          | 318                       | 0.1250            | 81                       | 0.1918            | 236                   | 0.1025            |
| anginosus              | 51                        | 0.0052            | 9                        | 0.0008            | 42                    | 0.0067            |
| unclassified           | 317                       | 0.1198            | 81                       | 0.1910            | 235                   | 0.0958            |
| Corynebacterium        | 345                       | 0.1121            | 86                       | 0.0761            | 258                   | 0.1249            |
| Anaerococcus           | 300                       | 0.0700            | 78                       | 0.0745            | 222                   | 0.0688            |
| Planococcaceae         | 221                       | 0.0401            | 58                       | 0.0457            | 162                   | 0.0383            |
| Alcaligenaceae         | 194                       | 0.0379            | 40                       | 0.0020            | 153                   | 0.0502            |
| Paenibacillus          | 293                       | 0.0364            | 79                       | 0.0429            | 214                   | 0.0342            |
| Brevibacterium         | 222                       | 0.0325            | 44                       | 0.0070            | 177                   | 0.0414            |
| Comamonadaceae         | 321                       | 0.0193            | 84                       | 0.0227            | 236                   | 0.0178            |
| Finegoldia             | 245                       | 0.0151            | 64                       | 0.0111            | 181                   | 0.0165            |
| Helcococcus            | 207                       | 0.0125            | 46                       | 0.0144            | 160                   | 0.0119            |
| Pseudomonas            | 110                       | 0.0109            | 20                       | 0.0014            | 90                    | 0.0142            |
| Actinomycetales        | 151                       | 0.0103            | 33                       | 0.0048            | 118                   | 0.0123            |

**Table S3. Summaries of taxonomic composition by community type.** The values shown are the mean relative abundance for each community type. Only the top 25 taxa are shown. Species belonging to the same genera are combined for convenience.

|                 | <b>CT 1</b> | <b>CT 2</b> | <b>CT 3</b> | <b>CT 4</b> |
|-----------------|-------------|-------------|-------------|-------------|
| Streptococcus   | 0.0466      | 0.0528      | 0.6175      | 0.0275      |
| anginosus       | 0.0048      | 0.0083      | 0.0032      | 0.0000      |
| unclassified    | 0.0418      | 0.0445      | 0.6143      | 0.0275      |
| Staphylococcus  | 0.2759      | 0.1710      | 0.0975      | 0.3688      |
| aureus          | 0.1205      | 0.1012      | 0.0918      | 0.3479      |
| pettenkoferi    | 0.0880      | 0.0374      | 0.0026      | 0.0152      |
| sciuri          | 0.0025      | 0.0001      | 0.0000      | 0.0000      |
| haemolyticus    | 0.0001      | 0.0004      | 0.0001      | 0.0000      |
| unclassified    | 0.0649      | 0.0320      | 0.0030      | 0.0057      |
| Corynebacterium | 0.1586      | 0.0885      | 0.0269      | 0.1191      |
| simulans        | 0.0024      | 0.0042      | 0.0010      | 0.0001      |
| stationis       | 0.0000      | 0.0000      | 0.0000      | 0.0000      |
| unclassified    | 0.1563      | 0.0843      | 0.0259      | 0.1190      |
| Anaerococcus    | 0.0370      | 0.0884      | 0.0623      | 0.1759      |
| Planococcaceae  | 0.0539      | 0.0345      | 0.0050      | 0.0442      |
| Brevibacterium  | 0.0385      | 0.0346      | 0.0016      | 0.0419      |
| Paenibacillus   | 0.0582      | 0.0233      | 0.0058      | 0.0206      |
| Alcaligenaceae  | 0.0479      | 0.0495      | 0.0061      | 0.0008      |
| Helcococcus     | 0.0079      | 0.0114      | 0.0079      | 0.0440      |
| Finegoldia      | 0.0114      | 0.0197      | 0.0095      | 0.0254      |
| Comamonadaceae  | 0.0245      | 0.0246      | 0.0020      | 0.0009      |
| Peptoniphilus   | 0.0054      | 0.0134      | 0.0095      | 0.0204      |
| Actinomycetales | 0.0056      | 0.0185      | 0.0076      | 0.0106      |
| Porphyromonas   | 0.0023      | 0.0141      | 0.0123      | 0.0107      |
| Prevotella      | 0.0101      | 0.0032      | 0.0135      | 0.0026      |

**Table S4. Clinical factors associated with the DFU microbiome at baseline.**

Association/correlation between clinical factors and features of the DFU microbiome as measured at initial study visit. Spearman rank correlations were used for continuous variables.

Significant values ( $p < 0.05$ ) are bolded.

|                                    | CRP    |         | Depth        |              | HbA1C        |              | Tissue Oxygen |         | Area          |              | Duration     |              | WBC    |         |
|------------------------------------|--------|---------|--------------|--------------|--------------|--------------|---------------|---------|---------------|--------------|--------------|--------------|--------|---------|
|                                    | rho    | p-value | rho          | p-value      | rho          | p-value      | rho           | p-value | rho           | p-value      | rho          | p-value      | rho    | p-value |
| <b>Anaerobes</b>                   | -0.057 | 0.594   | <b>0.210</b> | <b>0.048</b> | -0.049       | 0.648        | 0.102         | 0.349   | 0.031         | 0.777        | -0.112       | 0.298        | 0.131  | 0.222   |
| <b>Anaerococcus</b>                | 0.040  | 0.713   | 0.204        | 0.055        | 0.036        | 0.736        | -0.016        | 0.886   | 0.087         | 0.416        | -0.037       | 0.734        | 0.131  | 0.223   |
| <b>Corynebacterium</b>             | 0.099  | 0.355   | -0.065       | 0.544        | 0.038        | 0.726        | 0.029         | 0.791   | 0.053         | 0.621        | 0.099        | 0.357        | -0.144 | 0.179   |
| <b>Firmicutes</b>                  | -0.051 | 0.635   | -0.033       | 0.759        | 0.144        | 0.179        | 0.138         | 0.203   | -0.084        | 0.436        | -0.091       | 0.398        | -0.028 | 0.799   |
| <b>Phylogenetic Diversity</b>      | 0.044  | 0.682   | 0.047        | 0.661        | -0.061       | 0.568        | 0.090         | 0.406   | 0.063         | 0.556        | 0.091        | 0.394        | 0.011  | 0.923   |
| <b>Proteobacteria</b>              | -0.065 | 0.543   | -0.129       | 0.228        | -0.150       | 0.161        | -0.056        | 0.610   | 0.097         | 0.366        | 0.139        | 0.193        | -0.043 | 0.689   |
| <b>OTU Richness</b>                | -0.059 | 0.582   | -0.005       | 0.967        | -0.122       | 0.253        | 0.218         | 0.043   | -0.053        | 0.624        | 0.035        | 0.746        | -0.048 | 0.655   |
| <b>S. aureus</b>                   | 0.088  | 0.411   | -0.080       | 0.457        | -0.048       | 0.653        | 0.036         | 0.743   | -0.095        | 0.378        | -0.114       | 0.290        | -0.130 | 0.228   |
| <b>Unclassified Staphylococcus</b> | -0.018 | 0.869   | -0.109       | 0.307        | 0.152        | 0.154        | 0.112         | 0.303   | <b>-0.283</b> | <b>0.007</b> | 0.044        | 0.684        | -0.168 | 0.118   |
| <b>S. pettenkoferi</b>             | -0.017 | 0.878   | -0.165       | 0.123        | 0.016        | 0.885        | 0.183         | 0.089   | <b>-0.286</b> | <b>0.007</b> | -0.104       | 0.331        | -0.119 | 0.269   |
| <b>Shannon Diversity</b>           | 0.051  | 0.634   | -0.008       | 0.942        | -0.146       | 0.172        | 0.081         | 0.454   | 0.076         | 0.481        | -0.051       | 0.632        | 0.010  | 0.925   |
| <b>Staphylococcus</b>              | 0.070  | 0.517   | -0.208       | 0.050        | 0.034        | 0.752        | 0.065         | 0.553   | -0.186        | 0.081        | -0.108       | 0.313        | -0.182 | 0.089   |
| <b>Streptococcus</b>               | 0.163  | 0.126   | 0.173        | 0.105        | <b>0.221</b> | <b>0.037</b> | -0.002        | 0.984   | 0.018         | 0.871        | <b>0.289</b> | <b>0.006</b> | 0.037  | 0.729   |

**Table S5. Estimated Markov chain parameters of DFU CT transitions.** The values shown are 1) the stationary distribution, which describes the expected frequencies of CTs to be for a Markov chain, and 2) the expected recurrence time, which estimates the average time it would take to encounter the same CT again. Both show marked changes in the stability and frequency of CT3 and CT4 between DFUs that heal within 12 weeks and those that do not.

|            | Stationary Distribution |           | Expected Recurrence Time (weeks) |           |
|------------|-------------------------|-----------|----------------------------------|-----------|
|            | <12 weeks               | >12 weeks | <12 weeks                        | >12 weeks |
| <b>CT1</b> | 0.5460                  | 0.4330    | 3.66                             | 4.62      |
| <b>CT2</b> | 0.3240                  | 0.2012    | 6.17                             | 9.94      |
| <b>CT3</b> | 0.0343                  | 0.1341    | 58.28                            | 14.91     |
| <b>CT4</b> | 0.0958                  | 0.2317    | 20.89                            | 8.63      |
